# Supplementary material
Source: PubMed Central journal article supplement (PMC5024630)

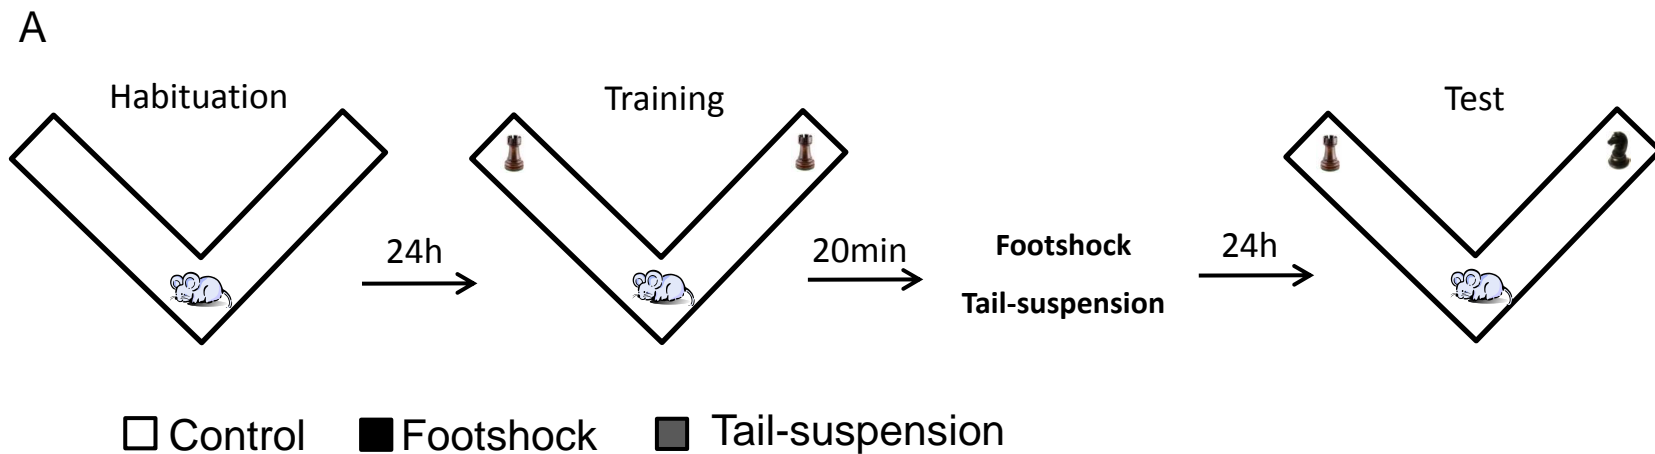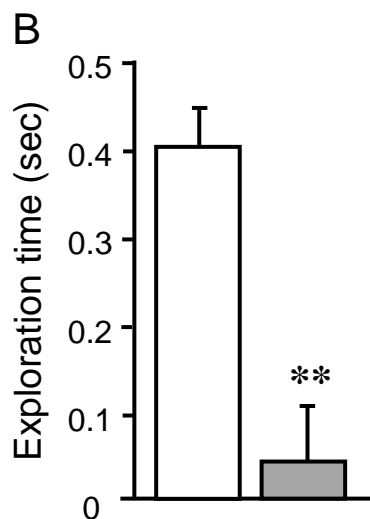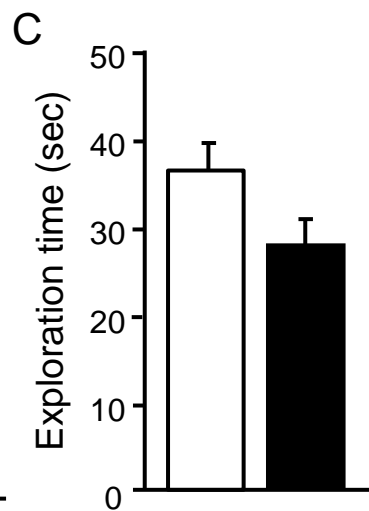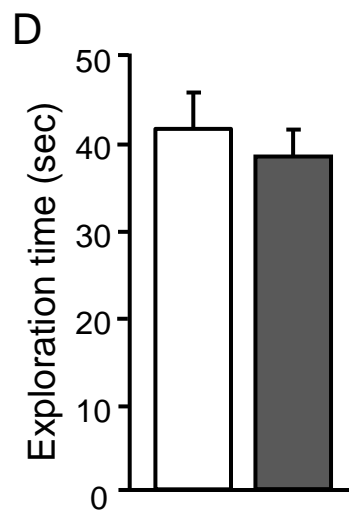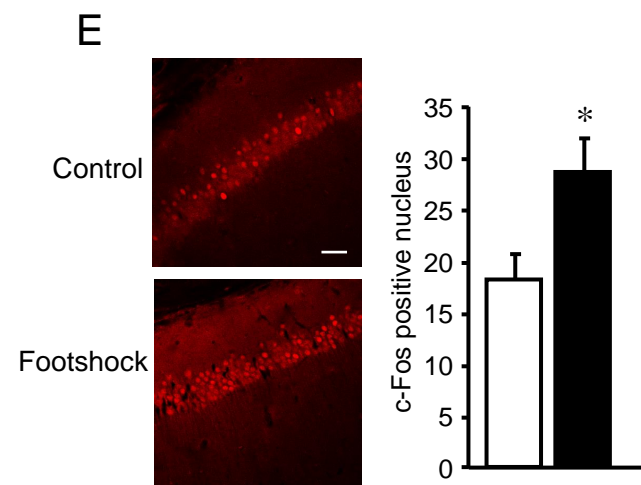

Supplement: pnas.1525066113.sfig01.pdf [file pnas.1525066113.sfig01.pdf]

□ Control    ■ Footshock

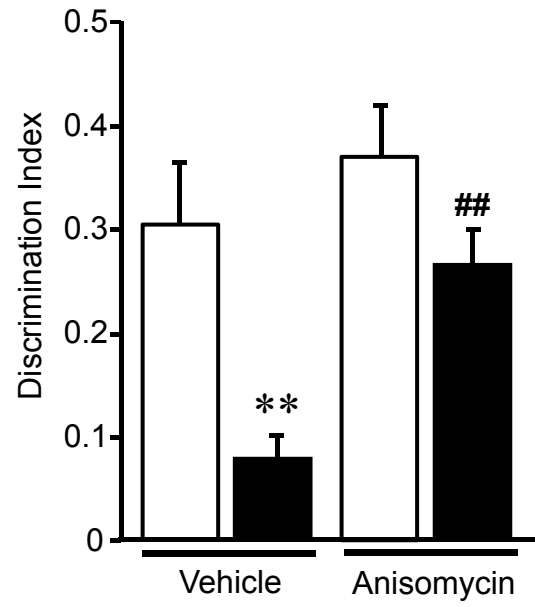

Supplement: pnas.1525066113.sfig02.pdf [file pnas.1525066113.sfig02.pdf]

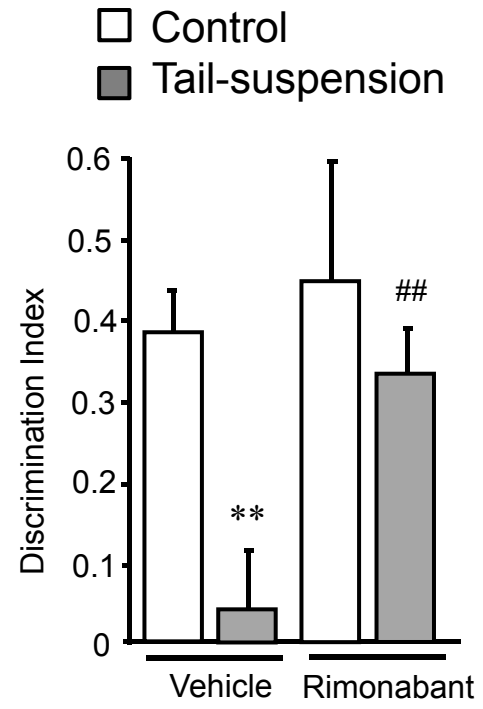

Supplement: pnas.1525066113.sfig03.pdf [file pnas.1525066113.sfig03.pdf]

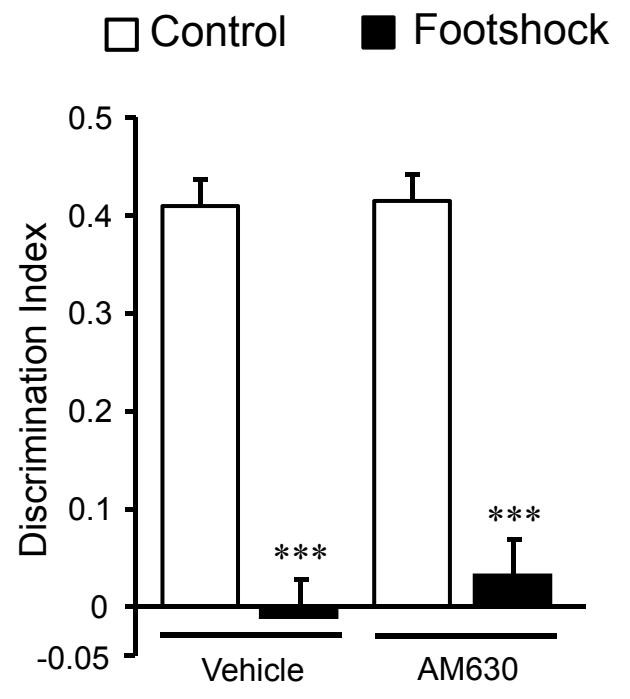

Supplement: pnas.1525066113.sfig04.pdf [file pnas.1525066113.sfig04.pdf]

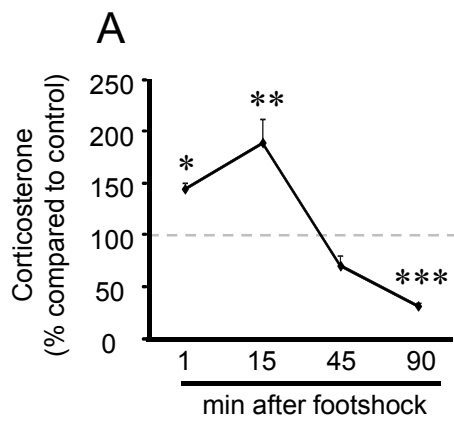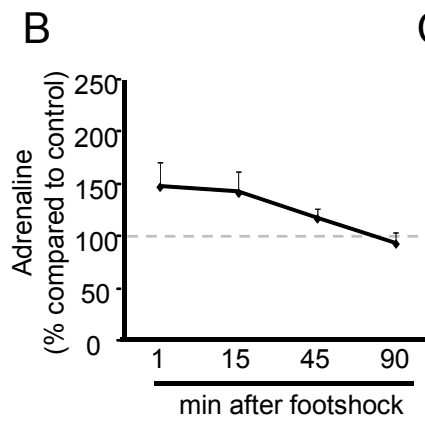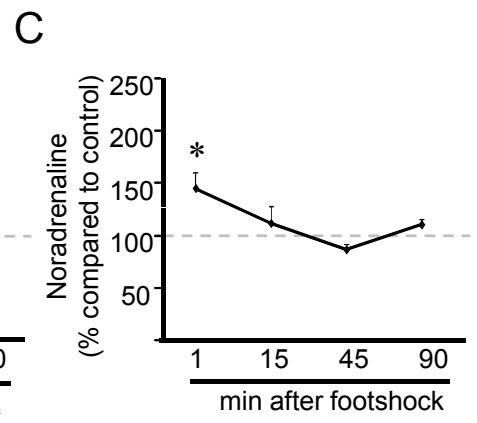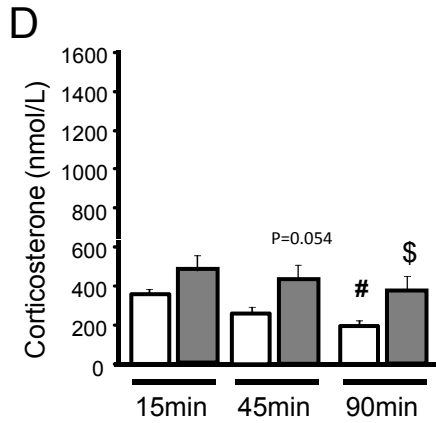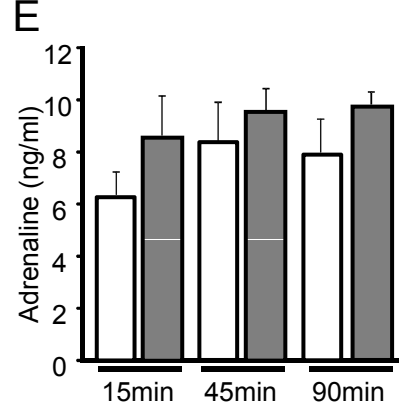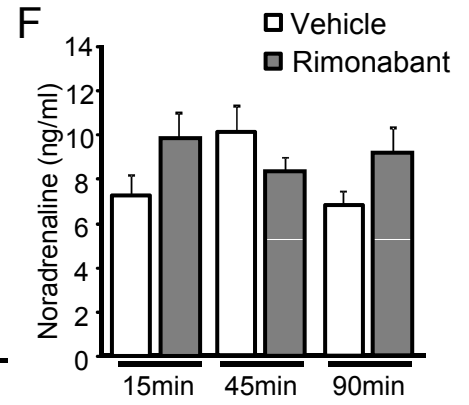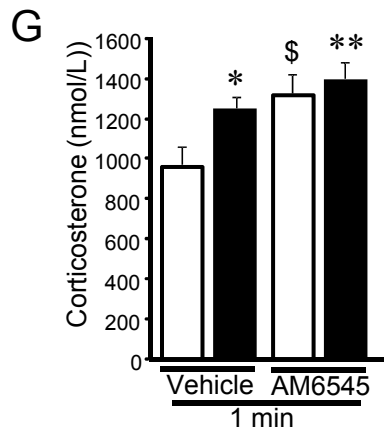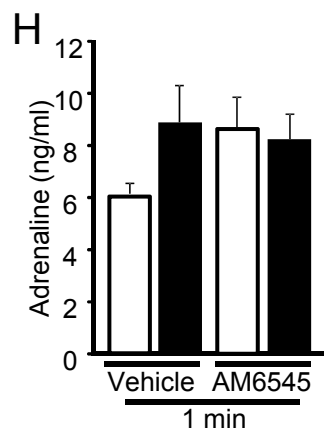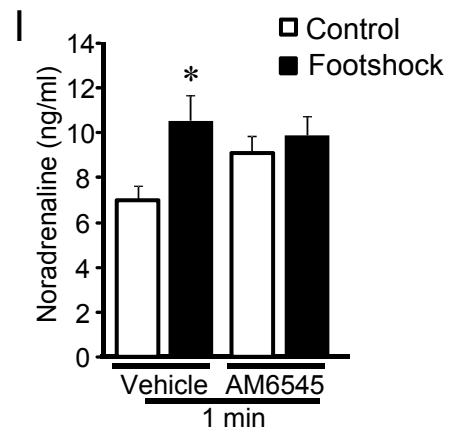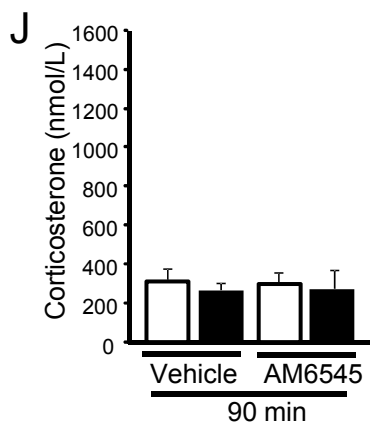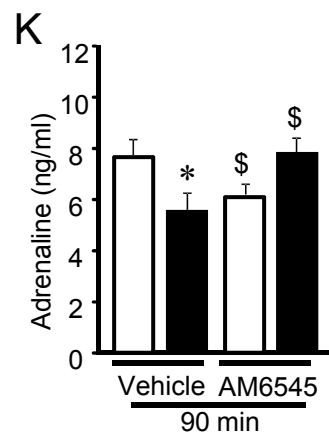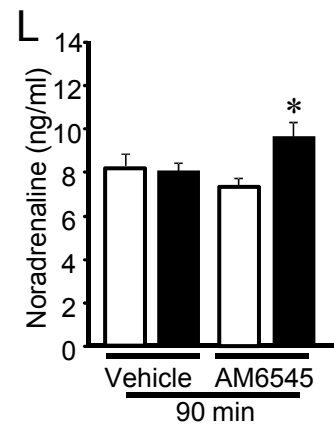

Supplement: pnas.1525066113.sfig05.pdf [file pnas.1525066113.sfig05.pdf]

A

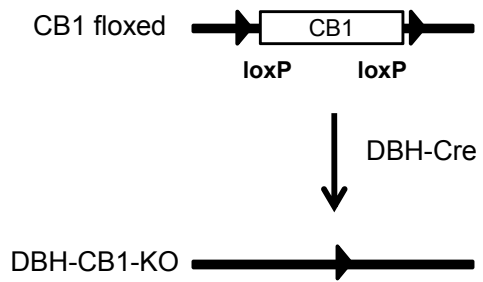

B

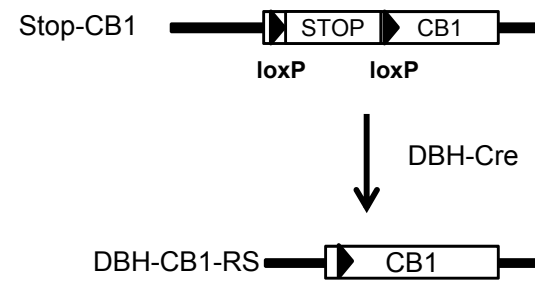

C

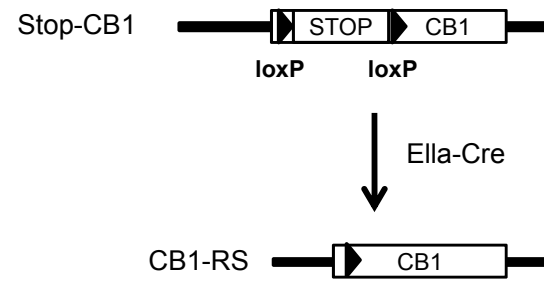

Supplement: pnas.1525066113.sfig06.pdf [file pnas.1525066113.sfig06.pdf]

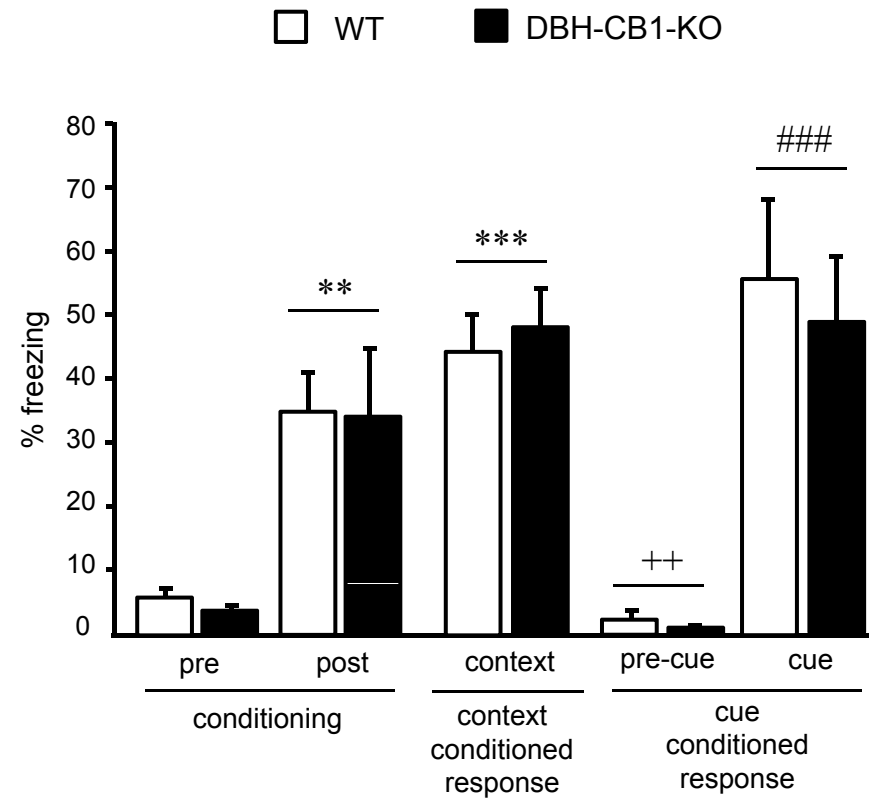

Supplement: pnas.1525066113.sfig07.pdf [file pnas.1525066113.sfig07.pdf]

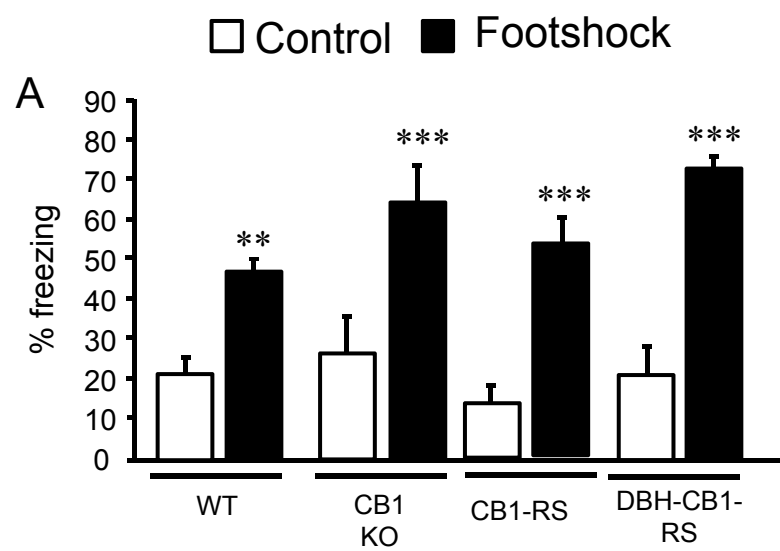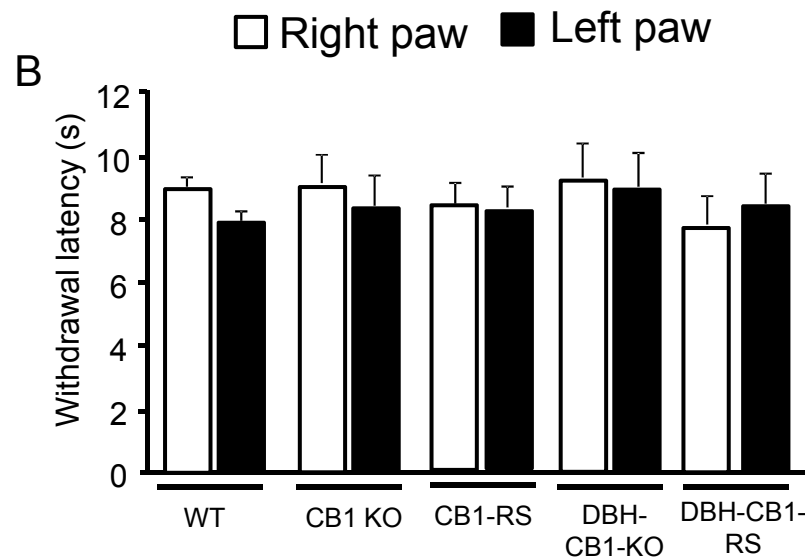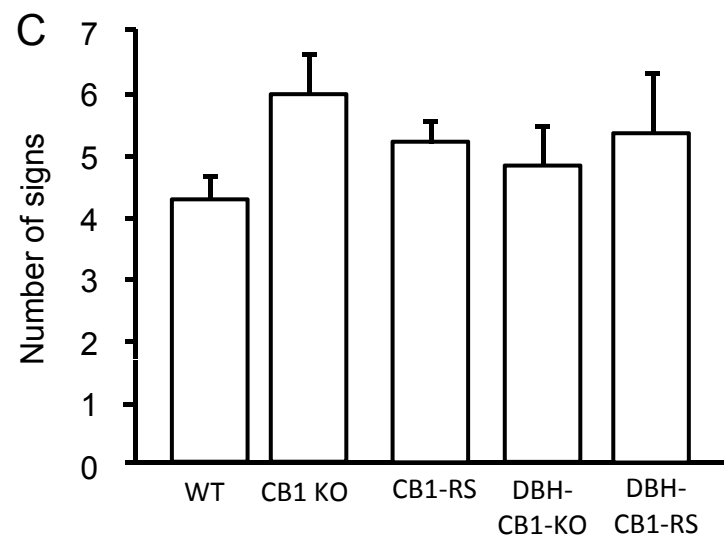

Supplement: pnas.1525066113.sfig08.pdf [file pnas.1525066113.sfig08.pdf]

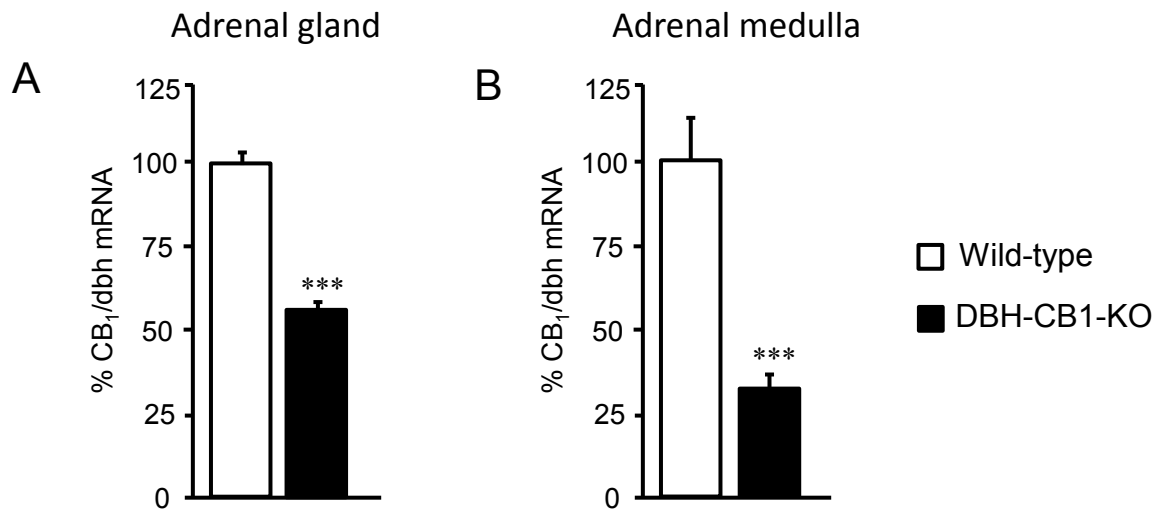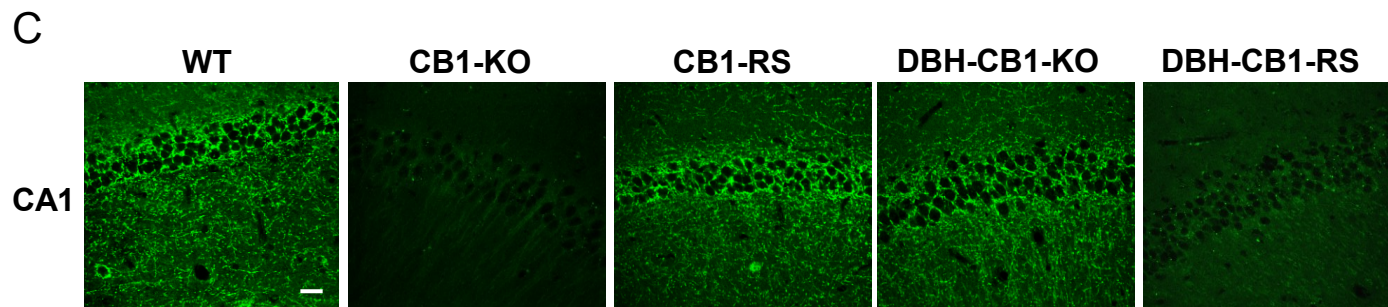

Supplement: pnas.1525066113.sfig09.pdf [file pnas.1525066113.sfig09.pdf]

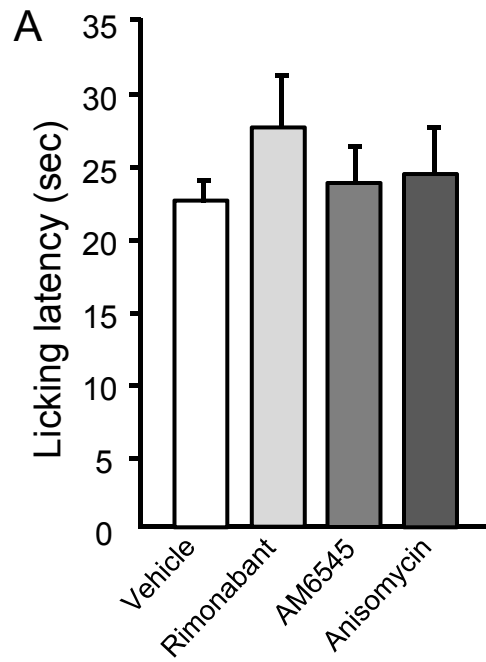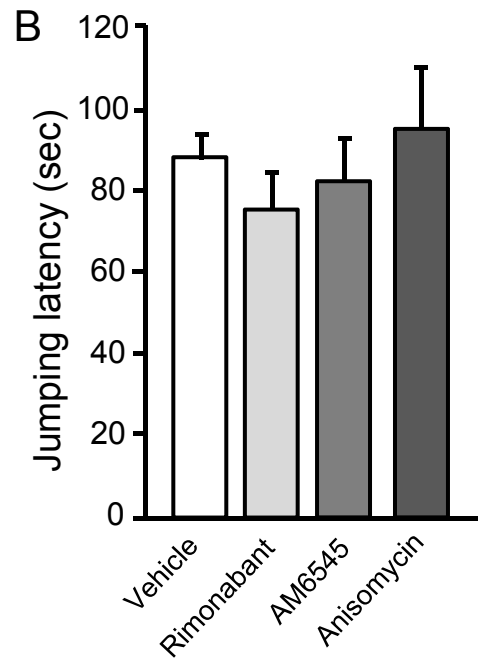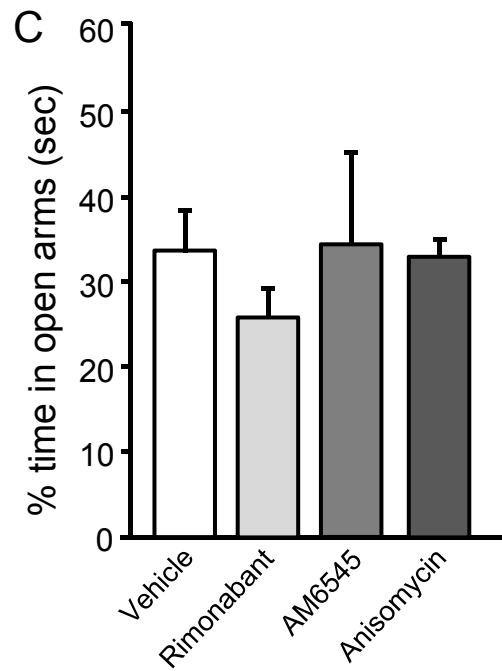

Supplement: pnas.1525066113.sfig10.pdf [file pnas.1525066113.sfig10.pdf]
